# Supplementary material for: Evolution of magnetism by rolling up hexagonal boron nitride nanosheets tailored with superparamagnetic nanoparticles
Source: Royal Society of Chemistry journal article supplement (doi:10.1039/c6cp08353f), 2017-01-01
Supplement: c6cp08353f1.pdf [file c6cp08353f1.pdf]

ESI for

***Evolution of magnetism in Rolling up hexagonal  
boron nitride nanosheets tailored superparamagnetic  
nanoparticles***

*Da Young Hwang<sup>†</sup>, Kyoung Hwan Choi<sup>†</sup>, Jeong Eon Park<sup>†</sup> and Dong Hack Suh<sup>†\*</sup>*

<sup>†</sup>Division of Chemical Engineering, College of Engineering, Hanyang University, Seoul,  
04763, Republic of Korea

\*Corresponding author. E-mail: dhsuh@hanyang.ac.kr

**Figure S1. (a) SEM, (b) TEM and (c) AFM images of the exfoliated boron nitride sheets.**

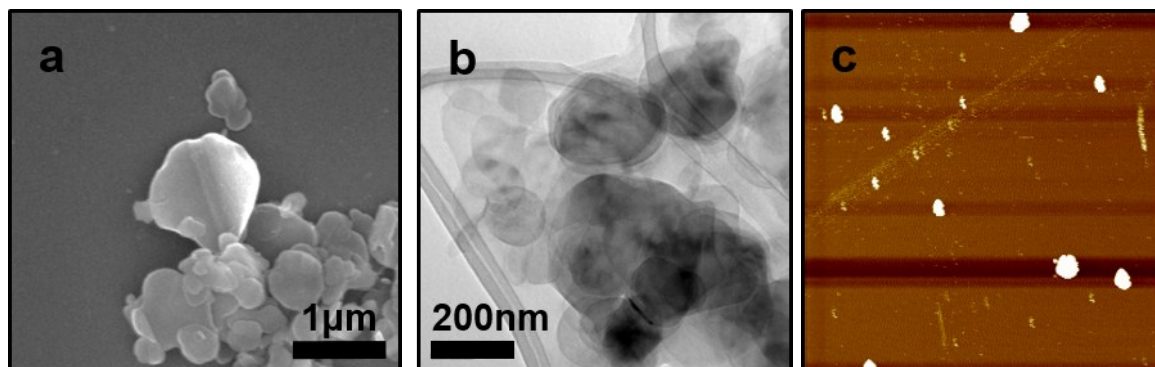

The boron nitride in dichlorobenzene (ODCB) was homogenized at 1000 rpm for 1 hr followed by centrifugation at 4400 rpm for 30 minutes and collected from the supernatant dispersions. The concentration of the final exfoliated h-BN was calculated using the vacuum filter through a weighed membrane. The exfoliated h-BN solution had a concentration of 0.089mg/mL. SEM and TEM images of the exfoliated h-BN are shown in Figure S1a-b. The multi-layers boron nitride with the size of typically several hundred nanometers is observed. Additionally, an AFM image (Fig.S1c) shows the thickness of layers. The thickness of thinnest boron nitride is below few nm.

Figure S2. TEM images and XRD spectrum of Fe<sub>3</sub>O<sub>4</sub> NPs.

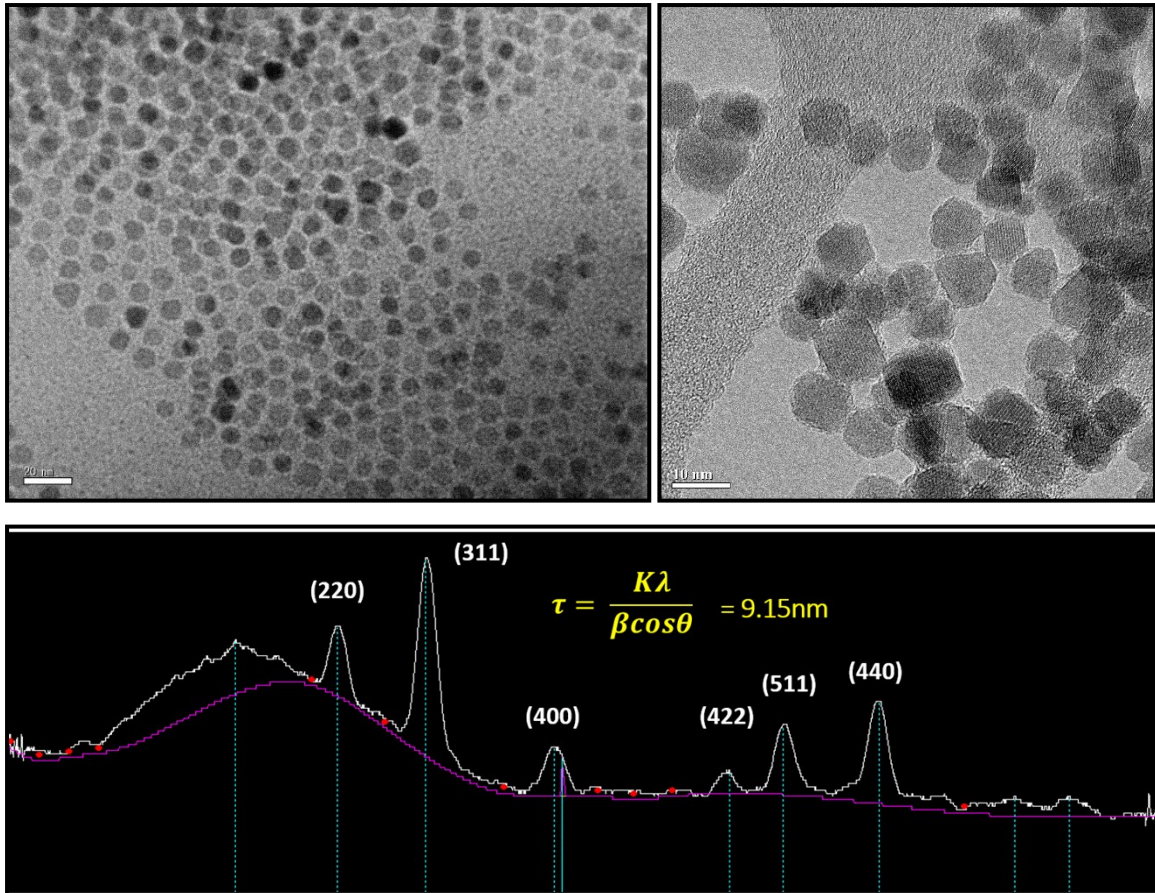

**Figure S3. TEM images of h-BN-Fe<sub>3</sub>O<sub>4</sub> sheets produced by the attachment of Fe<sub>3</sub>O<sub>4</sub> NPs to the h-BN surface.**

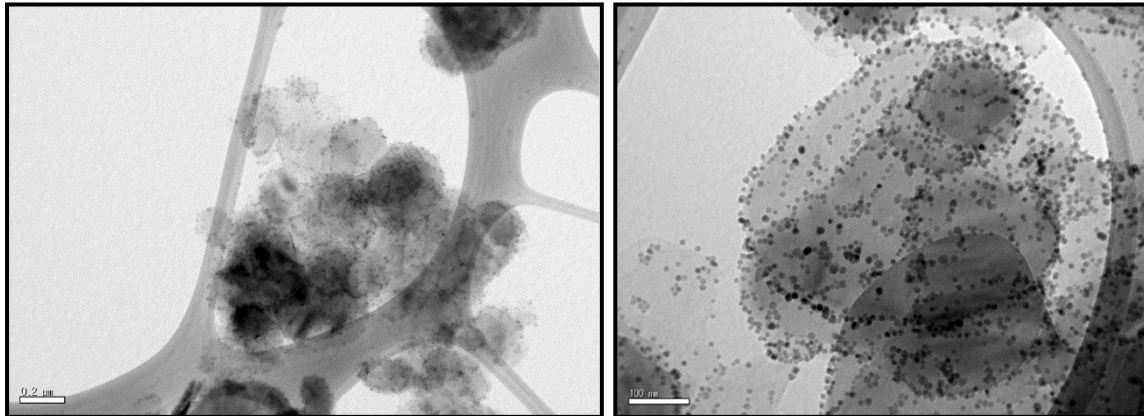

TEM images of the synthesized h-BN-Fe<sub>3</sub>O<sub>4</sub> sheets with low magnification. Magnified TEM images of the few layer h-BN surface with homogeneous attachment of Fe<sub>3</sub>O<sub>4</sub> nanoparticles with size of 9 nm.

**Figure S4. Collected TEM images h-BN-Fe<sub>3</sub>O<sub>4</sub> nanoscrolls (BNFS) from several samples with a diameter up to 80 nm.**

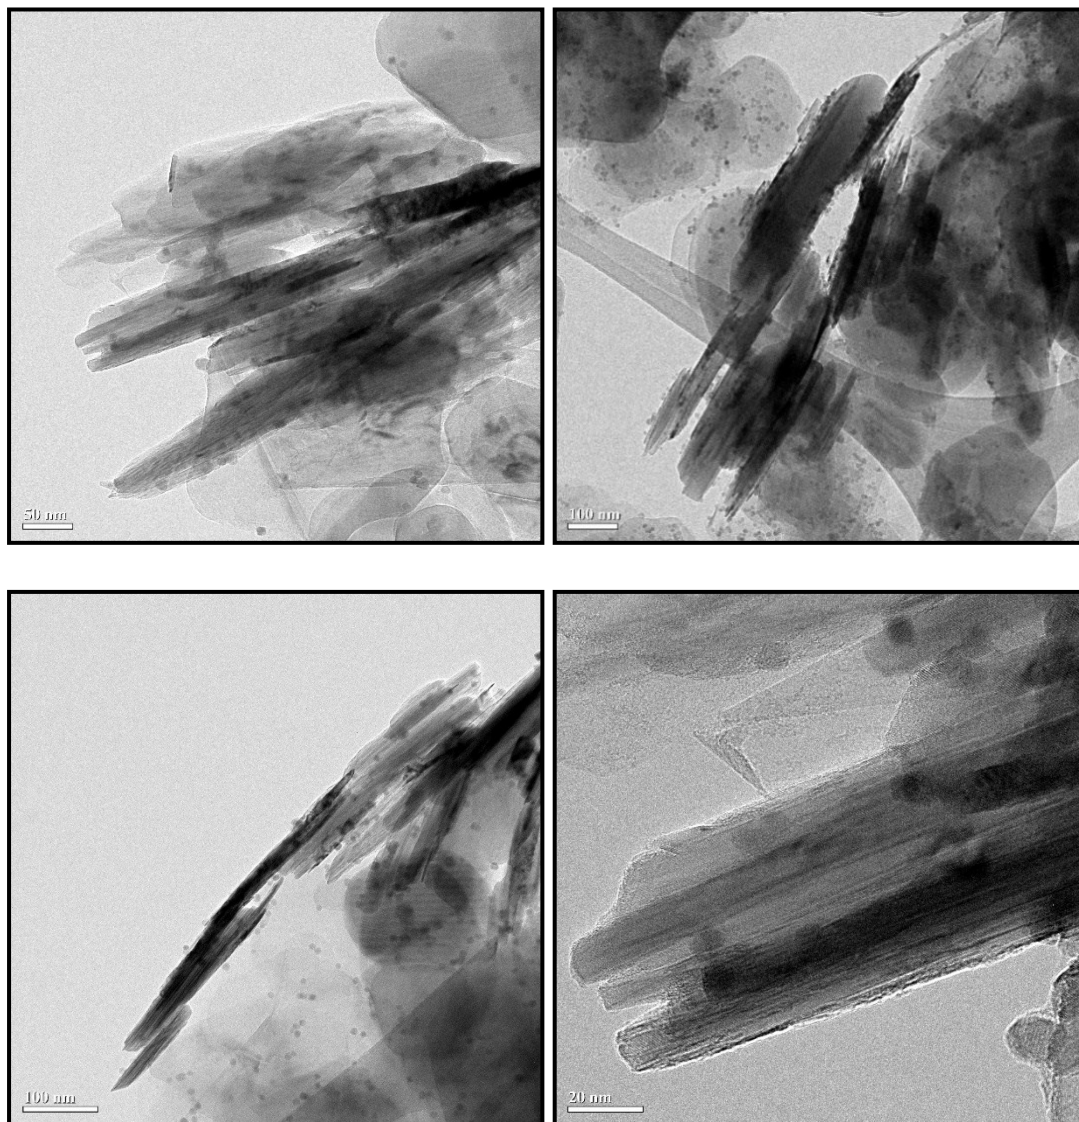

**Figure S5. TEM images of h-BN nanoscrolls (BNS) and Fe<sub>3</sub>O<sub>4</sub> NPs hybrids.**

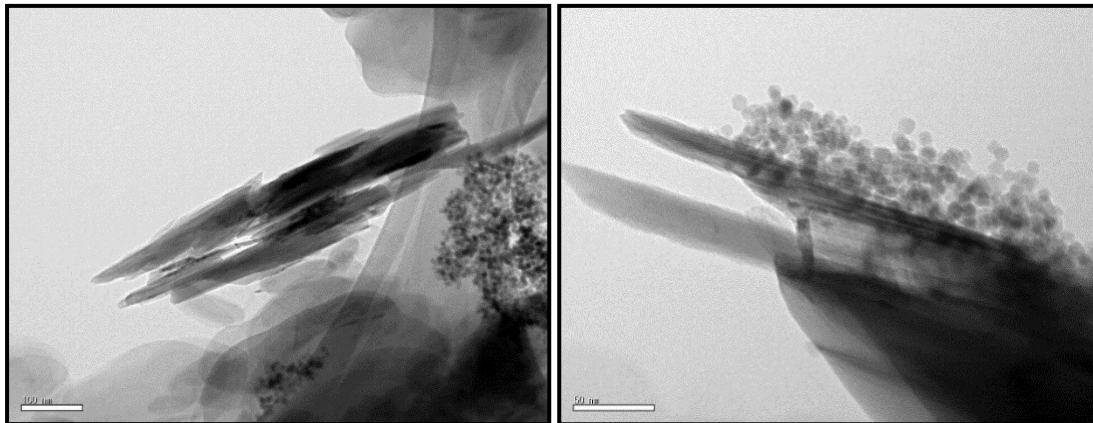

TEM images of the synthesized h-BN nanoscrolls (BNSs) according to the previous work<sup>1</sup> and hybrids with Fe<sub>3</sub>O<sub>4</sub> NP solution. Magnified TEM images of the few layer BNSs with aggregation of Fe<sub>3</sub>O<sub>4</sub> nanoparticles because interaction between Fe<sub>3</sub>O<sub>4</sub> NPs is higher than that between Fe<sub>3</sub>O<sub>4</sub> and LCA.

**Figure S6. TEM images of Au@Fe<sub>3</sub>O<sub>4</sub> NPs and h-BN-Au@Fe<sub>3</sub>O<sub>4</sub> NPs sheets**

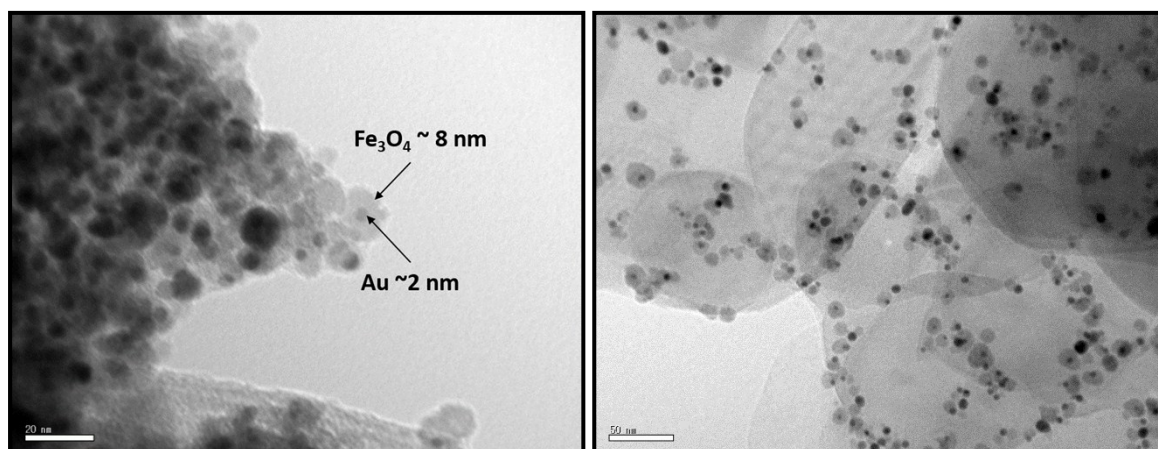

TEM images show well dispersed Au@Fe<sub>3</sub>O<sub>4</sub> NPs in solution and the synthesized h-BN-Au@Fe<sub>3</sub>O<sub>4</sub> sheets with low magnification. Magnified TEM images of the few layer h-BN surface with homogeneous attachment of Au@Fe<sub>3</sub>O<sub>4</sub> nanoparticles with size of 2 and 8nm, respectively.

Figure S7. Collected TEM images h-BN-Au@Fe<sub>3</sub>O<sub>4</sub> nanoscrolls from several samples.

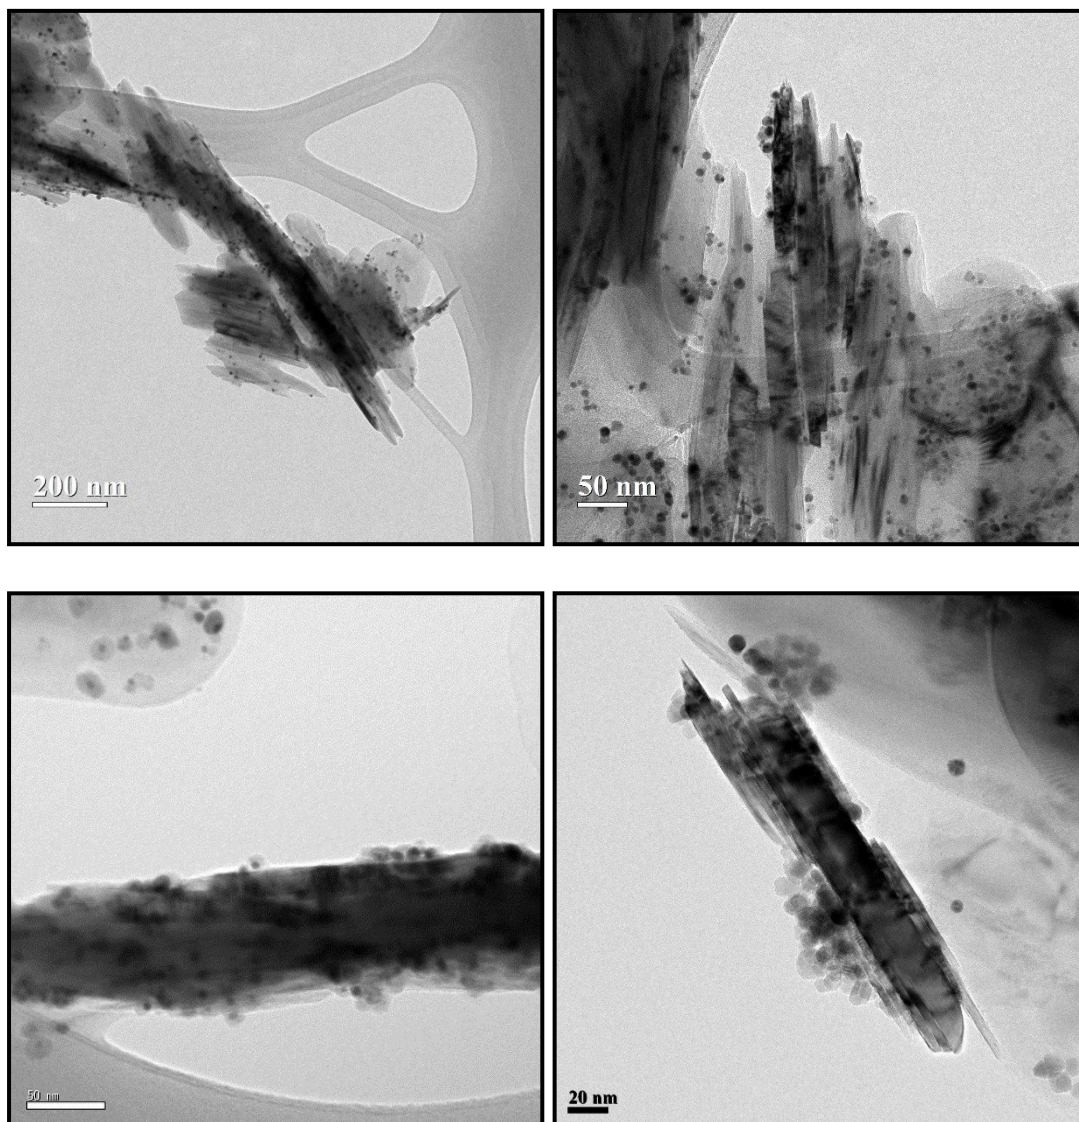



Figure S8. EDS mapping images and spectrum of h-BN-Au@Fe<sub>3</sub>O<sub>4</sub> nanoscrolls for various elements (B, N, Fe, O and Au).

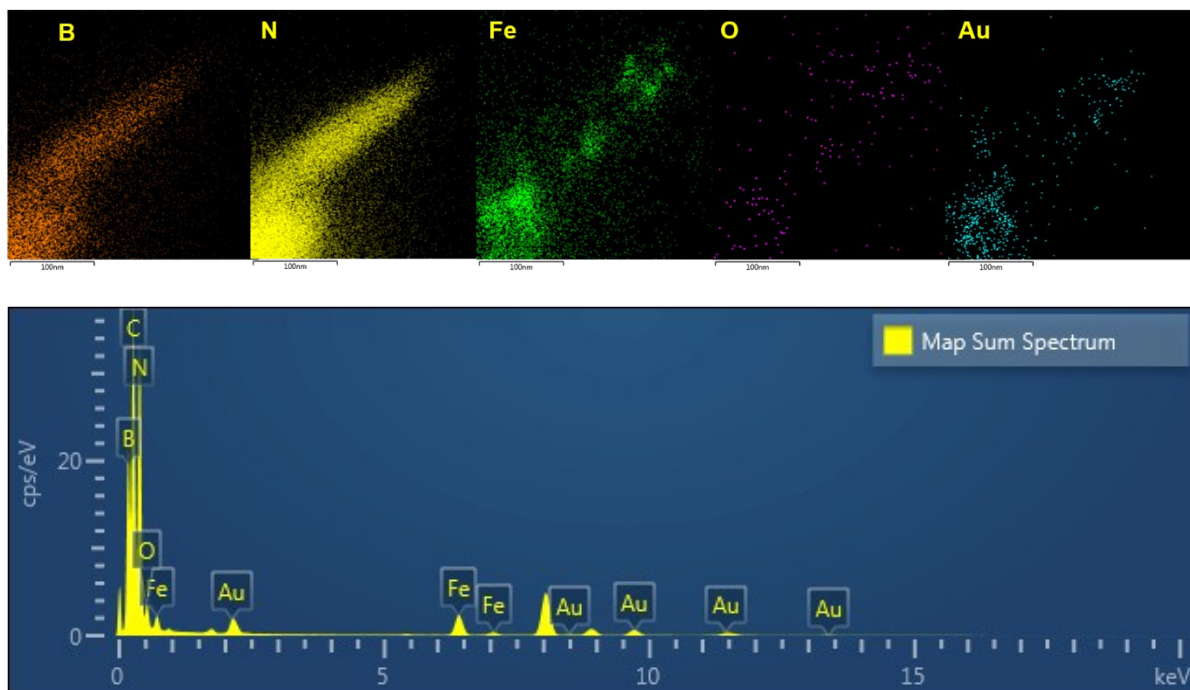

**Figure S9. TGA curves for Fe<sub>3</sub>O<sub>4</sub> NPs and Hexagonal boron nitride sheets and nanoscrolls with Fe<sub>3</sub>O<sub>4</sub> NPs through the heat treatment.** TGA curves of the Fe<sub>3</sub>O<sub>4</sub> NPs (black), BN-Fe<sub>3</sub>O<sub>4</sub> scrolls (red) and BN-Fe<sub>3</sub>O<sub>4</sub> sheets (blue).

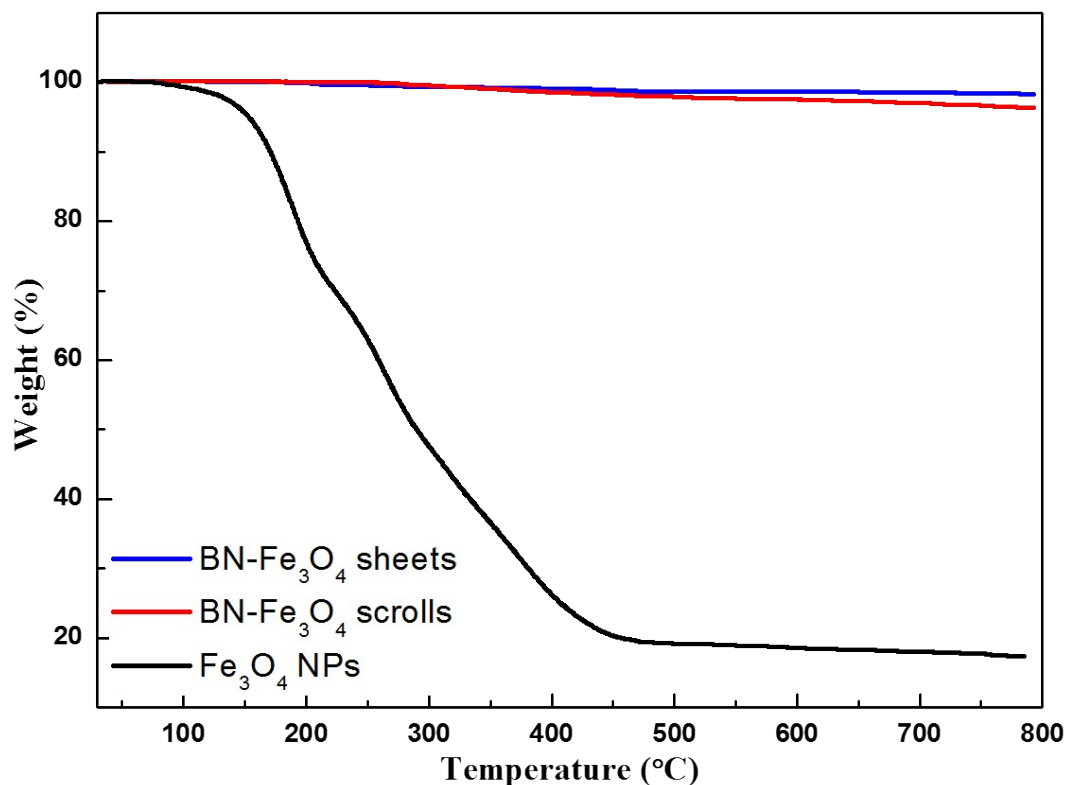

Hexagonal boron nitride derivatives were thermally treated under a N<sub>2</sub> atmosphere at a heating rate of 10°C/min to 800°C. The TGA curves show the thermal degradation of Fe<sub>3</sub>O<sub>4</sub> NPs, BN-Fe<sub>3</sub>O<sub>4</sub> scrolls and BN-Fe<sub>3</sub>O<sub>4</sub> sheets. In case of Fe<sub>3</sub>O<sub>4</sub> NPs, the sharp degradation at 200°C followed by 20 wt% of Fe<sub>3</sub>O<sub>4</sub> NPs are observed in TGA curves. BN-Fe<sub>3</sub>O<sub>4</sub> scrolls and BN-Fe<sub>3</sub>O<sub>4</sub> sheets with slight reduction in the weight is stable up to 800°C. Additionally, the thermal degradation of Fe<sub>3</sub>O<sub>4</sub> in BN-Fe<sub>3</sub>O<sub>4</sub> scrolls and BN-Fe<sub>3</sub>O<sub>4</sub> sheets begins at 300°C maintaining the shape of boron nitride sheets and scrolls.

Figure S10. Magnetization vs. magnetic field curve of boron nitride sheets and BNSs.

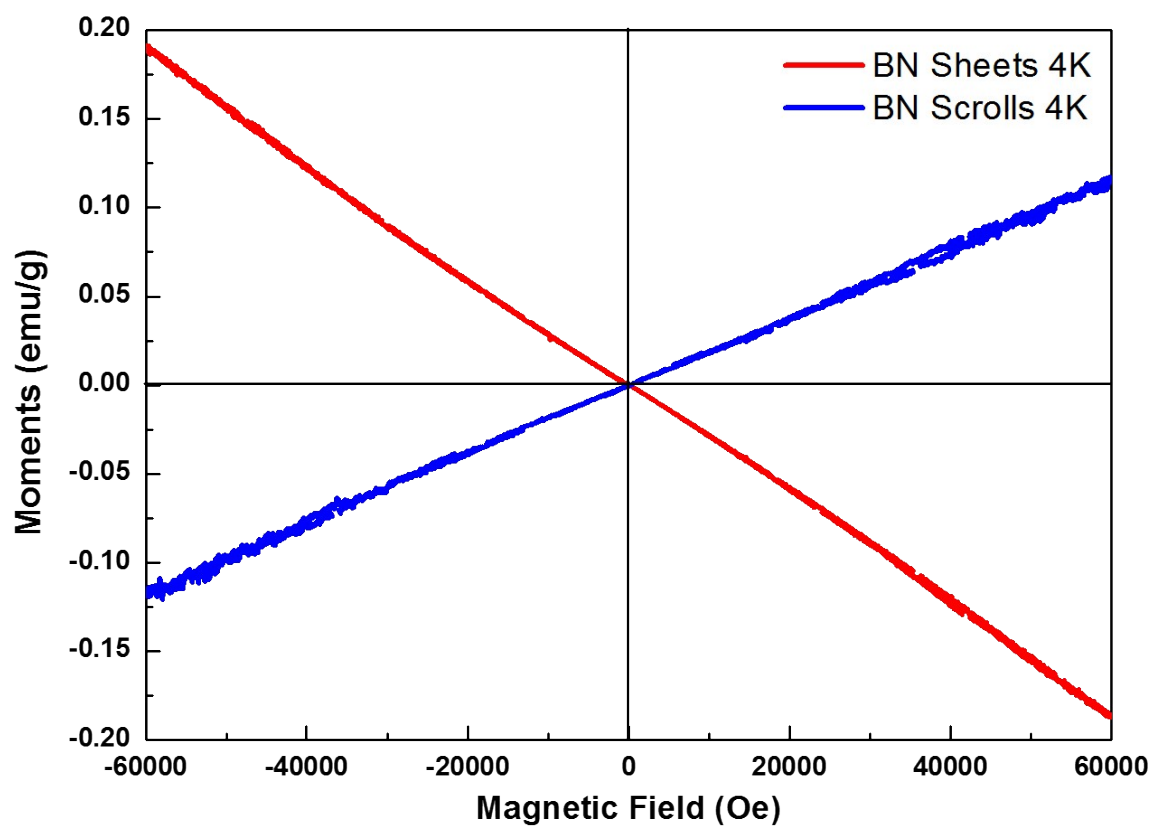

Figure S11. Magnetization vs. magnetic field curve of h-BN-Au@Fe<sub>3</sub>O<sub>4</sub> sheets and their scrolls at 4 and 300K.

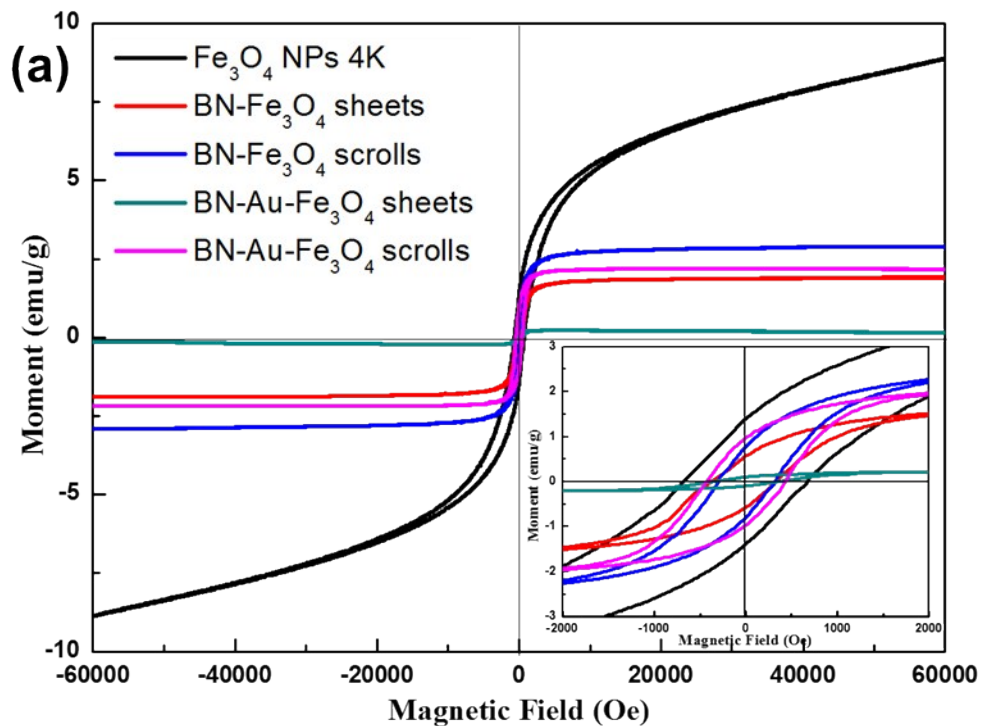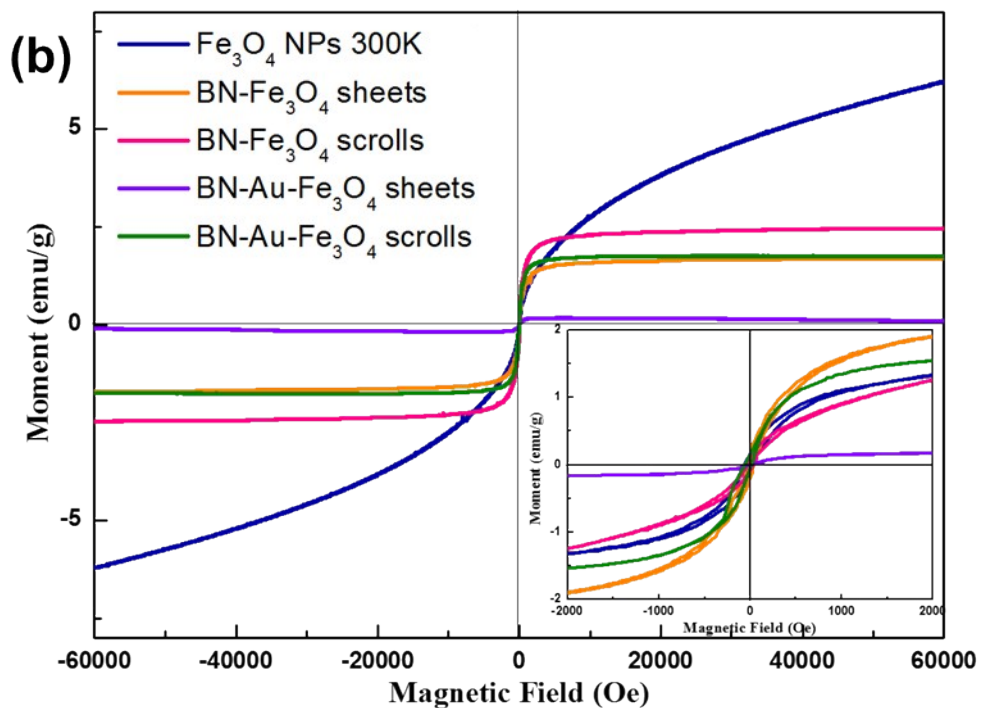

Figure S12. FC and ZFC magnetic susceptibilities versus temperature at 20 Oe for  $\text{Fe}_3\text{O}_4$  NPs, h-BN- $\text{Fe}_3\text{O}_4$  nanoscrolls and h-BN-Au@ $\text{Fe}_3\text{O}_4$  (Janus) nanoscrolls.

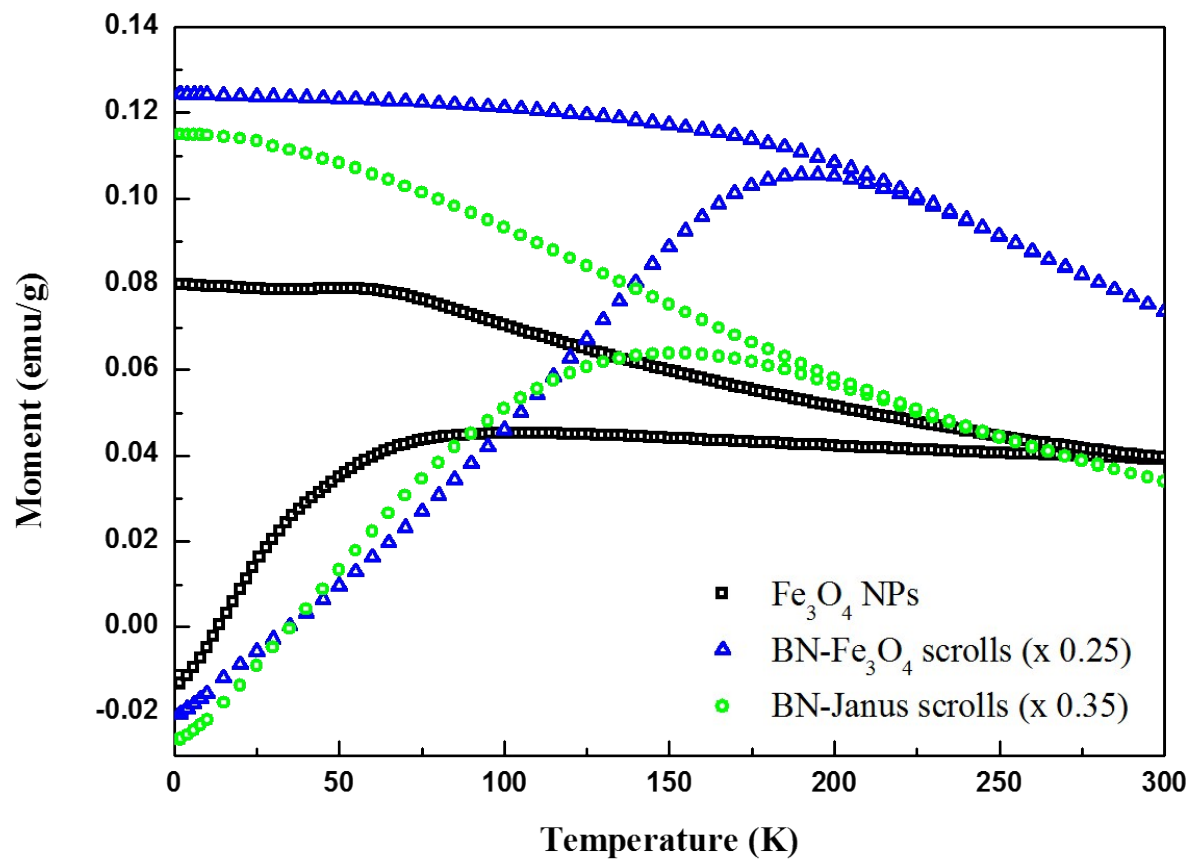

## References

1. D. Y. Hwang and D. H. Suh, *Nanoscale*, 2014, **6**, 5686-5690.
